# Supplementary material for: Microencapsulation of Chilean Papaya Waste Extract and Its Impact on Physicochemical and Bioactive Properties
Source: MDPI journal article supplement (doi:10.3390/antiox12101900), 2023-10-23
Supplement: s1 [file s1]

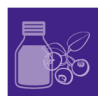

## Article

# Microencapsulation of Chilean Papaya Waste Extract and Its Impact on Physicochemical and Bioactive Properties

Yihajara Fuentes<sup>1</sup>, Claudia Giovagnoli-Vicuña<sup>1\*</sup>, Mario Faundez<sup>2</sup> and Ady Giordano<sup>1\*</sup>

<sup>1</sup> Departamento de Química Inorgánica, Escuela de Química, Facultad de Química y de Farmacia, Pontificia Universidad Católica de Chile, Macul, Chile.; yyfuentes@uc.cl

<sup>2</sup> Departamento de Farmacia, Escuela de Química y Farmacia, Facultad de Química y de Farmacia, Pontificia Universidad Católica de Chile, Macul, Chile; mfaundeza@uc.cl

\* Correspondence: agiordano@uc.cl; ccgiovagnoli@uc.cl

**Table S1.** Parameters for UHPLC-MS/MS determination of polyphenols.

| Polyphenol       | Retention time<br>(min) | Product Ion 1<br>(m/z) | Product Ion 2<br>(m/z) | Collision Energy<br>(V) |
|------------------|-------------------------|------------------------|------------------------|-------------------------|
| Gallic Acid      | 3.53                    | 124.9                  | 78.9                   | -70                     |
| Chlorogenic Acid | 6.99                    | 191                    | 85                     | -75                     |
| Caffeic Acid     | 7.2                     | 135                    | 133.9                  | -70                     |
| Coumaric Acid    | 8.53                    | 119                    | 92.8                   | -70                     |
| Rutin            | 9.63                    | 299.8                  | 300.5                  | -70                     |
| Quercetin        | 11.74                   | 150.9                  | 178.8                  | -70                     |
| Ferulic Acid     | 11.76                   | 146.9                  | 102.9                  | -5                      |
